# Supplementary material
Source: publisher site journal article supplement (https://www.dovepress.com/article/336602)

**Supplemental Table 1. The bioinformatics tools applied to analyze the roles of *TEAD* family in OSC biological processes.**

| **Databases** | **URL** | **Refs** |
| --- | --- | --- |
| GEPIA | http://gepia.cancer-pku.cn/ | [14] |
| GE-mini | http://gemini.cancer-pku.cn/ | [15] |
| Oncomine3.0 | https://www.oncomine.org/resource/login.html | [16] |
| Kaplan-Meier plotter | http://kmplot.com/analysis/ | [17] |
| cBioPortal | http://www.cbioportal.org/ | [18] |
| STRING | https://string-db.org/cgi/input.pl | [19] |
| WebGestalt | http://www.webgestalt.org/ | [20] |
| TIMER2.0 | https://cistrome.shinyapps.io/timer/ | [21] |

**References**

14. Tang Z, Li C, Kang B, Gao G, Li C, Zhang Z. GEPIA: a web server for cancer and normal gene expression profiling and interactive analyses. Nucleic acids research. Jul 3 2017;45(W1):W98-W102.

15. Tang Z, Li C, Zhang K, Yang M, Hu X. GE-mini: a mobile APP for large-scale gene expression visualization. Bioinformatics. Mar 15 2017;33(6):941-943.

16. Rhodes DR, Yu J, Shanker K, et al. ONCOMINE: a cancer microarray database and integrated data-mining platform. Neoplasia. Jan-Feb 2004;6(1):1-6.

17. Gyorffy B, Gyorffy A, Tulassay Z. [The problem of multiple testing and solutions for genome-wide studies]. Orvosi hetilap. Mar 20 2005;146(12):559-563.

18. Cerami E, Gao J, Dogrusoz U, et al. The cBio cancer genomics portal: an open platform for exploring multidimensional cancer genomics data. Cancer discovery. May 2012;2(5):401-404.

19. Szklarczyk D, Morris JH, Cook H, et al. The STRING database in 2017: quality-controlled protein-protein association networks, made broadly accessible. Nucleic acids research. Jan 4 2017;45(D1):D362-D368.

20. Wang J, Vasaikar S, Shi Z, Greer M, Zhang B. WebGestalt 2017: a more comprehensive, powerful, flexible and interactive gene set enrichment analysis toolkit. Nucleic acids research. Jul 3 2017;45(W1):W130-W137.

21. Li T, Fu J, Zeng Z, et al. TIMER2.0 for analysis of tumor-infiltrating immune cells. Nucleic acids research. Jul 2 2020;48(W1):W509-W514.

**Supplemental Table 2. *TEAD* family-associated coexpression genes in OSC patients.**

| **Correlated Gene** | **Cytoband** | **Spearman's Correlation** | **p-Value** | **q-Value** |
| --- | --- | --- | --- | --- |
| NUP98 | 11p15.4 | 0.532639084 | 9.99E-15 | 1.04E-10 |
| CELF1 | 11p11.2 | 0.530459397 | 1.34E-14 | 1.04E-10 |
| FAR1 | 11p15.3 | 0.529284953 | 1.57E-14 | 1.04E-10 |
| TOMM6 | 6p21.1 | -0.515390687 | 9.72E-14 | 3.83E-10 |
| USP47 | 11p15.3 | 0.514060238 | 1.15E-13 | 3.83E-10 |
| STRN | 2p22.2 | 0.514043062 | 1.15E-13 | 3.83E-10 |
| TRAPPC4 | 11q23.3 | -0.497477434 | 9.04E-13 | 2.39E-09 |
| DENND5A | 11p15.4 | 0.496987751 | 9.60E-13 | 2.39E-09 |
| PARVA | 11p15.3 | 0.492717951 | 1.60E-12 | 3.23E-09 |
| SBF2 | 11p15.4 | 0.492608469 | 1.62E-12 | 3.23E-09 |
| RPL26L1 | 5q35.1 | -0.488392415 | 2.67E-12 | 4.83E-09 |
| DCXR | 17q25.3 | -0.487186122 | 3.08E-12 | 5.10E-09 |
| CUTA | 6p21.32 | -0.477426296 | 9.46E-12 | 1.45E-08 |
| SSH2 | 17q11.2 | 0.475873642 | 1.13E-11 | 1.54E-08 |
| MRPL55 | 1q42.13 | -0.475632781 | 1.16E-11 | 1.54E-08 |
| RPP21 | 6p22.1 | -0.474440422 | 1.32E-11 | 1.65E-08 |
| MEA1 | 6p21.1 | -0.473029099 | 1.55E-11 | 1.71E-08 |
| KRTCAP2 | 1q22 | -0.472384151 | 1.67E-11 | 1.71E-08 |
| TAOK1 | 17q11.2 | 0.471884514 | 1.76E-11 | 1.71E-08 |
| CENPX | 17q25.3 | -0.471854656 | 1.77E-11 | 1.71E-08 |
| SNRPC | 6p21.31 | -0.471687447 | 1.80E-11 | 1.71E-08 |
| NCOA3 | 20q13.12 | 0.470704099 | 2.01E-11 | 1.78E-08 |
| GARRE1 | 19q13.11 | 0.470495322 | 2.06E-11 | 1.78E-08 |
| PRELID1 | 5q35.3 | -0.469722742 | 2.24E-11 | 1.86E-08 |
| C15ORF61 | 15q23 | -0.468184021 | 2.65E-11 | 2.11E-08 |
| RPS10 | 6p21.31 | -0.467419638 | 2.89E-11 | 2.20E-08 |
| KIF1B | 1p36.22 | 0.467125031 | 2.98E-11 | 2.20E-08 |
| MPC2 | 1q24.2 | -0.46503492 | 3.75E-11 | 2.66E-08 |
| PPFIBP1 | 12p11.23-p11.22 | 0.463271264 | 4.54E-11 | 3.11E-08 |
| SCAND1 | 20q11.23 | -0.462602428 | 4.88E-11 | 3.24E-08 |
| MRPL2 | 6p21.1 | -0.461786289 | 5.33E-11 | 3.42E-08 |
| RASA2 | 3q23 | 0.460932329 | 5.84E-11 | 3.63E-08 |
| POLR1H | 6p22.1 | -0.45864515 | 7.46E-11 | 4.50E-08 |
| DNPH1 | 6p21.1 | -0.457954418 | 8.03E-11 | 4.64E-08 |
| RPL32 | 3p25.2 | -0.457809105 | 8.15E-11 | 4.64E-08 |
| SMIM29 | 6p21.31 | -0.456537123 | 9.33E-11 | 5.16E-08 |
| COA6 | 1q42.2 | -0.456057392 | 9.81E-11 | 5.26E-08 |
| KIAA1109 | 4q27 | 0.455846391 | 1.00E-10 | 5.26E-08 |
| SWAP70 | 11p15.4 | 0.454811288 | 1.12E-10 | 5.71E-08 |
| MRPL14 | 6p21.1 | -0.45430568 | 1.18E-10 | 5.88E-08 |
| LSM3 | 3p25.1 | -0.452265333 | 1.46E-10 | 7.10E-08 |
| PRELID1P6 | 2p15 | -0.45167413 | 1.55E-10 | 7.37E-08 |
| NOTCH2 | 1p12 | 0.450296647 | 1.79E-10 | 8.31E-08 |
| EIF4G3 | 1p36.12 | 0.449096325 | 2.03E-10 | 9.20E-08 |
| HIPK3 | 11p13 | 0.44856683 | 2.15E-10 | 9.24E-08 |
| COX7A2 | 6q14.1 | -0.448562849 | 2.15E-10 | 9.24E-08 |
| PHRF1 | 11p15.5 | 0.448415546 | 2.18E-10 | 9.24E-08 |
| EXOSC4 | 8q24.3 | -0.447563577 | 2.38E-10 | 9.87E-08 |
| MYCBP2 | 13q22.3 | 0.447181385 | 2.48E-10 | 1.01E-07 |
| LUZP1 | 1p36.12 | 0.446373208 | 2.69E-10 | 1.07E-07 |
| MYL12B | 18p11.31 | -0.444207455 | 3.36E-10 | 1.31E-07 |
| SPEN | 1p36.21-p36.13 | 0.442849877 | 3.85E-10 | 1.47E-07 |
| HP1BP3 | 1p36.12 | 0.440560707 | 4.85E-10 | 1.82E-07 |
| RPUSD3 | 3p25.3 | -0.438259594 | 6.11E-10 | 2.25E-07 |
| ERCC6L2 | 9q22.32 | 0.437540994 | 6.56E-10 | 2.38E-07 |
| ANAPC11 | 17q25.3 | -0.436565608 | 7.23E-10 | 2.57E-07 |
| AAK1 | 2p13.3 | 0.435904735 | 7.72E-10 | 2.66E-07 |
| CCDC107 | 9p13.3 | -0.435878857 | 7.74E-10 | 2.66E-07 |
| FRY | 13q13.1 | 0.435653921 | 7.92E-10 | 2.67E-07 |
| SLK | 10q24.33-q25.1 | 0.435150304 | 8.32E-10 | 2.76E-07 |
| ARHGAP21 | 10p12.1 | 0.434204777 | 9.13E-10 | 2.98E-07 |
| GUK1 | 1q42.13 | -0.434039559 | 9.28E-10 | 2.98E-07 |
| RPS18 | 6p21.32 | -0.432528707 | 1.08E-09 | 3.40E-07 |
| SPTY2D1 | 11p15.1 | 0.431905654 | 1.14E-09 | 3.56E-07 |
| CDKL5 | Xp22.13 | 0.43144583 | 1.20E-09 | 3.61E-07 |
| HPS5 | 11p15.1 | 0.431435877 | 1.20E-09 | 3.61E-07 |
| METTL5 | 2q31.1 | -0.431183073 | 1.23E-09 | 3.65E-07 |
| MRPS18A | 6p21.1 | -0.430872542 | 1.27E-09 | 3.70E-07 |
| POLR1C | 6p21.1 | -0.430739173 | 1.28E-09 | 3.70E-07 |
| TIMM8B | 11q23.1 | -0.430380868 | 1.33E-09 | 3.78E-07 |
| BOLA1 | 1q21.2 | -0.428903856 | 1.53E-09 | 4.30E-07 |
| EYA3 | 1p35.3 | 0.428105632 | 1.66E-09 | 4.52E-07 |
| MIDEAS | 14q24.3 | 0.428095679 | 1.66E-09 | 4.52E-07 |
| RPL14 | 3p22.1 | -0.427349211 | 1.78E-09 | 4.79E-07 |
| SCN8A | 12q13.13 | 0.427118303 | 1.82E-09 | 4.83E-07 |
| BTBD10 | 11p15.3 | 0.426998868 | 1.84E-09 | 4.83E-07 |
| C16ORF91 | 16p13.3 | -0.426825688 | 1.87E-09 | 4.84E-07 |
| PLEKHA7 | 11p15 | 0.426212588 | 1.99E-09 | 5.07E-07 |
| DUSP23 | 1q23.2 | -0.424890841 | 2.25E-09 | 5.58E-07 |
| NAXE | 1q22 | -0.424878898 | 2.26E-09 | 5.58E-07 |
| MED1 | 17q12 | 0.424811218 | 2.27E-09 | 5.58E-07 |
| GLRX2 | 1q31.2 | -0.424243902 | 2.40E-09 | 5.82E-07 |
| CTR9 | 11p15.4 | 0.42399906 | 2.45E-09 | 5.89E-07 |
| USP48 | 1p36.12 | 0.423803983 | 2.50E-09 | 5.90E-07 |
| MARCHF8 | 10q11.21-q11.22 | 0.423734313 | 2.52E-09 | 5.90E-07 |
| IMP3 | 15q24.2 | -0.423545208 | 2.56E-09 | 5.93E-07 |
| MRPS23 | 17q22 | -0.423115242 | 2.67E-09 | 6.11E-07 |
| MICAL2 | 11p15.3 | 0.421534719 | 3.10E-09 | 7.02E-07 |
| SBNO1 | 12q24.31 | 0.421335661 | 3.16E-09 | 7.07E-07 |
| CZIB | 1p32.3 | -0.420587202 | 3.39E-09 | 7.50E-07 |
| CASS4 | 20q13.31 | 0.420292596 | 3.49E-09 | 7.57E-07 |
| NDUFA2 | 5q31.3 | -0.420266718 | 3.50E-09 | 7.57E-07 |
| DNAJC13 | 3q22.1 | 0.420095528 | 3.55E-09 | 7.61E-07 |
| DIP2B | 12q13.12 | 0.419480438 | 3.76E-09 | 7.97E-07 |
| C6ORF226 | 6p21.1 | -0.419295314 | 3.83E-09 | 8.03E-07 |
| CLCN6 | 1p36.22 | 0.419024595 | 3.93E-09 | 8.15E-07 |
| SVIL | 10p11.23 | 0.418642403 | 4.07E-09 | 8.36E-07 |
| NDUFB1 | 14q31.3 | -0.41818855 | 4.25E-09 | 8.61E-07 |
| MICALCL | 11p15.3 | 0.418104946 | 4.28E-09 | 8.61E-07 |
| TMCO1 | 1q24.1 | -0.417975558 | 4.33E-09 | 8.63E-07 |
| MED13L | 12q24.21 | 0.417579432 | 4.50E-09 | 8.86E-07 |
| SOGA1 | 20q11.23 | 0.417414213 | 4.57E-09 | 8.91E-07 |
| REL | 2p16.1 | 0.417296769 | 4.62E-09 | 8.92E-07 |
| TTBK2 | 15q15.2 | 0.417171362 | 4.67E-09 | 8.94E-07 |
| ROCK2 | 2p25.1 | 0.416852869 | 4.81E-09 | 9.12E-07 |
| CSNK2B | 6p21.33 | -0.416106401 | 5.16E-09 | 9.69E-07 |
| OXLD1 | 17q25.3 | -0.41565852 | 5.38E-09 | 9.95E-07 |
| TRIM44 | 11p13 | 0.415612736 | 5.40E-09 | 9.95E-07 |
| EPG5 | 18q12.3-q21.1 | 0.414695078 | 5.88E-09 | 1.07367E-06 |
| NDUFB10 | 16p13.3 | -0.413741589 | 6.42E-09 | 1.16176E-06 |
| NTPCR | 1q42.2 | -0.413600257 | 6.50E-09 | 1.16638E-06 |
| ABHD14A | 3p21.2 | -0.413174273 | 6.76E-09 | 1.20218E-06 |
| MAD2L1BP | 6p21.1 | -0.412885638 | 6.94E-09 | 1.22358E-06 |
| DDI2 | 1p36.21 | 0.412706486 | 7.06E-09 | 1.23296E-06 |
| ZNF507 | 19q13.11 | 0.412401926 | 7.26E-09 | 1.25689E-06 |
| HSPE1 | 2q33.1 | -0.412204859 | 7.39E-09 | 1.26668E-06 |
| NUFIP2 | 17q11.2 | 0.412129217 | 7.44E-09 | 1.26668E-06 |
| CNIH4 | 1q42.11 | -0.412029688 | 7.51E-09 | 1.26746E-06 |
| JTB | 1q21.3 | -0.411794799 | 7.67E-09 | 1.28413E-06 |
| BRK1 | 3p25.3 | -0.411092123 | 8.18E-09 | 1.3501E-06 |
| PER3 | 1p36.23 | 0.41090899 | 8.32E-09 | 1.3501E-06 |
| RPS29 | 14q21.3 | -0.410895055 | 8.33E-09 | 1.3501E-06 |
| WDR61 | 15q25.1 | -0.410885103 | 8.34E-09 | 1.3501E-06 |
| PIK3C2A | 11p15.1 | 0.410361579 | 8.75E-09 | 1.4047E-06 |
| TGFBRAP1 | 2q12.1-q12.2 | 0.410220248 | 8.86E-09 | 1.41152E-06 |
| MTX1 | 1q22 | -0.409979388 | 9.06E-09 | 1.43137E-06 |
| MAP3K2 | 2q14.3 | 0.409790282 | 9.22E-09 | 1.44474E-06 |
| HYPK | 15q15.3 | -0.409025898 | 9.88E-09 | 1.52984E-06 |
| BYSL | 6p21.1 | -0.408988077 | 9.91E-09 | 1.52984E-06 |
| TRAPPC2L | 16q24.3 | -0.408639725 | 1.02E-08 | 1.56678E-06 |
| EIF4G2 | 11p15.4 | 0.408424743 | 1.04E-08 | 1.57707E-06 |
| ITSN1 | 21q22.11 | 0.408398865 | 1.05E-08 | 1.57707E-06 |
| NDUFAF3 | 3p21.31 | -0.408022645 | 1.08E-08 | 1.61941E-06 |
| TRIM66 | 11p15.4 | 0.407102996 | 1.18E-08 | 1.74648E-06 |
| BAZ2A | 12q13.3 | 0.406609331 | 1.23E-08 | 1.80582E-06 |
| NDUFB6 | 9p21.1 | -0.406567529 | 1.23E-08 | 1.80582E-06 |
| NPRL2 | 3p21.31 | -0.406404301 | 1.25E-08 | 1.81916E-06 |
| LATS1 | 6q25.1 | 0.406020119 | 1.30E-08 | 1.86943E-06 |
| MAIP1 | 2q33.1 | -0.405309481 | 1.38E-08 | 1.97074E-06 |
| SEC13 | 3p25.3 | -0.40520398 | 1.39E-08 | 1.97074E-06 |
| TNS1 | 2q35 | 0.405192036 | 1.40E-08 | 1.97074E-06 |
| INCENP | 11q12.3 | 0.405104451 | 1.41E-08 | 1.97228E-06 |
| SH3PXD2A | 10q24.33 | 0.404953167 | 1.43E-08 | 1.9848E-06 |
| SNRPE | 1q32.1 | -0.404877524 | 1.44E-08 | 1.9848E-06 |
| SPCS1 | 3p21.1 | -0.402785422 | 1.73E-08 | 2.34836E-06 |
| RPP25L | 9p13.3 | -0.402747601 | 1.74E-08 | 2.34836E-06 |
| OR52W1 | 11p15.4 | 0.402686901 | 1.75E-08 | 2.34836E-06 |
| NDUFAF8 | 17q25.3 | -0.402683902 | 1.75E-08 | 2.34836E-06 |
| NHP2 | 5q35.3 | -0.40250475 | 1.77E-08 | 2.37002E-06 |
| USP12 | 13q12.13 | 0.402188247 | 1.82E-08 | 2.42128E-06 |
| C1ORF53 | 1q31.3 | -0.401575148 | 1.93E-08 | 2.53754E-06 |
| NDUFAF4 | 6q16.1 | -0.401509459 | 1.94E-08 | 2.53754E-06 |
| C1ORF35 | 1q42.13 | -0.401276561 | 1.98E-08 | 2.57343E-06 |
| CMC1 | 3p24.1 | -0.400916265 | 2.04E-08 | 2.63945E-06 |
| STARD10 | 11q13.4 | -0.400675405 | 2.09E-08 | 2.67878E-06 |
| ELOB | 16p13.3 | -0.40055796 | 2.11E-08 | 2.68934E-06 |
| JAGN1 | 3p25.3 | -0.400225533 | 2.17E-08 | 2.7517E-06 |
| OCIAD2 | 4p11 | -0.400036428 | 2.21E-08 | 2.78022E-06 |
| ZNF688 | 16p11.2 | -0.399067014 | 2.40E-08 | 3.00857E-06 |
| TOMM5 | 9p13.2 | -0.398607189 | 2.50E-08 | 3.11283E-06 |
| DCTN3 | 9p13.3 | -0.398119497 | 2.61E-08 | 3.22744E-06 |
| BMP2K | 4q21.21 | 0.397990109 | 2.64E-08 | 3.22744E-06 |
| DPM3 | 1q22 | -0.397982146 | 2.64E-08 | 3.22744E-06 |
| NDUFAB1 | 16p12.2 | -0.397607917 | 2.73E-08 | 3.31445E-06 |
| TOPBP1 | 3q22.1 | 0.397428765 | 2.77E-08 | 3.34631E-06 |
| P2RX7 | 12q24.31 | 0.39700477 | 2.88E-08 | 3.45152E-06 |
| PTPRJ | 11p11.2 | 0.396726089 | 2.95E-08 | 3.5152E-06 |
| RPL24 | 3q12.3 | -0.396570823 | 2.99E-08 | 3.54185E-06 |
| MYO5A | 15q21.2 | 0.396451388 | 3.02E-08 | 3.55088E-06 |
| COA4 | 11q13.4 | -0.396405605 | 3.03E-08 | 3.55088E-06 |
| MRPL36 | 5p15.33 | -0.395955733 | 3.15E-08 | 3.67095E-06 |
| DPY19L3 | 19q13.11 | 0.395846251 | 3.18E-08 | 3.68449E-06 |
| UQCC2 | 6p21.31 | -0.395442163 | 3.30E-08 | 3.79396E-06 |
| PCNX1 | 14q24.2 | 0.395326709 | 3.33E-08 | 3.81012E-06 |
| KMT2D | 12q13.12 | 0.395071915 | 3.40E-08 | 3.86357E-06 |
| TSTD1 | 1q23.3 | -0.395034094 | 3.42E-08 | 3.86357E-06 |
| FAU | 11q13.1 | -0.39474944 | 3.50E-08 | 3.92797E-06 |
| SLC38A1 | 12q13.11 | 0.394695695 | 3.52E-08 | 3.92797E-06 |
| HINT2 | 9p13.3 | -0.394647921 | 3.53E-08 | 3.92797E-06 |
| RPL35 | 9q33.3 | -0.394361277 | 3.62E-08 | 4.00419E-06 |
| CCDC85B | 11q13.1 | -0.393909415 | 3.76E-08 | 4.14055E-06 |
| SMIM26 | 20p11.23 | -0.393561063 | 3.88E-08 | 4.24341E-06 |
| POP7 | 7q22.1 | -0.393266456 | 3.98E-08 | 4.32872E-06 |
| NDUFS8 | 11q13.2 | -0.393087304 | 4.04E-08 | 4.37212E-06 |
| MRPS34 | 16p13.3 | -0.392967869 | 4.08E-08 | 4.39341E-06 |
| REST | 4q12 | 0.392728999 | 4.17E-08 | 4.46049E-06 |
| RPS27A | 2p16.1 | -0.392533922 | 4.24E-08 | 4.51164E-06 |
| METTL23 | 17q25.2 | -0.392392591 | 4.29E-08 | 4.54245E-06 |
| CHCHD2 | 7p11.2 | -0.391240043 | 4.73E-08 | 4.98756E-06 |
| FER | 5q21.3 | 0.390971315 | 4.84E-08 | 5.07664E-06 |
| ARID1A | 1p36.11 | 0.390835955 | 4.90E-08 | 5.10881E-06 |
| ASXL1 | 20q11.21 | 0.390601066 | 5.00E-08 | 5.18517E-06 |
| MRPL24 | 1q23.1 | -0.389552029 | 5.47E-08 | 5.60745E-06 |
| FKBPL | 6p21.32 | -0.389532124 | 5.48E-08 | 5.60745E-06 |
| PTRH2 | 17q23.1 | -0.389500274 | 5.49E-08 | 5.60745E-06 |
| LMTK2 | 7q21.3 | 0.389114101 | 5.67E-08 | 5.765E-06 |
| APRT | 16q24.3 | -0.388851344 | 5.80E-08 | 5.84736E-06 |
| KMT2B | 19q13.12 | 0.388827457 | 5.81E-08 | 5.84736E-06 |
| C11ORF1 | 11q23.1 | -0.387864015 | 6.31E-08 | 6.31282E-06 |
| EMC4 | 15q14 | -0.387459927 | 6.53E-08 | 6.44601E-06 |

**Supplemental Table 3. The raw data of RT-PCR in figure 1D.**

| Sample | Internal control | Cq | Target gene 1 | Cq | Target gene 2 | Cq | Target gene 3 | Cq | Target gene 4 | Cq |
| --- | --- | --- | --- | --- | --- | --- | --- | --- | --- | --- |
| IOSE80 | 18S | 10.22 | TEAD1 | 23.18 | TEAD2 | 28.58 | TEAD3 | 25.80 | TEAD4 | 23.54 |
| IOSE80 | 18S | 10.16 | TEAD1 | 23.28 | TEAD2 | 28.65 | TEAD3 | 25.74 | TEAD4 | 23.22 |
| IOSE80 | 18S | 9.90 | TEAD1 | 23.43 | TEAD2 | 28.20 | TEAD3 | 25.54 | TEAD4 | 23.13 |
| A2780 | 18S | 11.04 | TEAD1 | 22.98 | TEAD2 | 25.14 | TEAD3 | 26.32 | TEAD4 | 22.64 |
| A2780 | 18S | 11.04 | TEAD1 | 23.10 | TEAD2 | 24.93 | TEAD3 | 26.79 | TEAD4 | 22.53 |
| A2780 | 18S | 11.36 | TEAD1 | 23.13 | TEAD2 | 25.23 | TEAD3 | 26.92 | TEAD4 | 23.03 |
| TOV112D | 18S | 12.81 | TEAD1 | 24.37 | TEAD2 | 26.18 | TEAD3 | 27.29 | TEAD4 | 24.21 |
| TOV112D | 18S | 12.60 | TEAD1 | 24.23 | TEAD2 | 26.28 | TEAD3 | 27.54 | TEAD4 | 24.05 |
| TOV112D | 18S | 12.49 | TEAD1 | 23.98 | TEAD2 | 26.16 | TEAD3 | 27.30 | TEAD4 | 23.99 |

**Supplemental Table 4. The raw data of RT-PCR in figure 1E.**

| Sample | Internal control | Cq | Target gene 1 | Cq | Target gene 2 | Cq | Target gene 3 | Cq | Target gene 4 | Cq |
| --- | --- | --- | --- | --- | --- | --- | --- | --- | --- | --- |
| N1 | 18S | 12.60 | TEAD1 | 29.80 | TEAD2 | 28.76 | TEAD3 | 29.43 | TEAD4 | 29.01 |
| N1 | 18S | 12.72 | TEAD1 | 29.69 | TEAD2 | 28.53 | TEAD3 | 28.62 | TEAD4 | 28.43 |
| N1 | 18S | 12.59 | TEAD1 | 30.18 | TEAD2 | 28.48 | TEAD3 | 27.54 | TEAD4 | 29.45 |
| N2 | 18S | 10.13 | TEAD1 | 27.43 | TEAD2 | 27.83 | TEAD3 | 27.93 | TEAD4 | 27.59 |
| N2 | 18S | 9.89 | TEAD1 | 28.89 | TEAD2 | 29.48 | TEAD3 | 26.90 | TEAD4 | 26.94 |
| N2 | 18S | 10.34 | TEAD1 | 29.95 | TEAD2 | 28.78 | TEAD3 | 28.95 | TEAD4 | 27.95 |
| N3 | 18S | 11.12 | TEAD1 | 28.33 | TEAD2 | 27.11 | TEAD3 | 27.53 | TEAD4 | 27.93 |
| N3 | 18S | 11.27 | TEAD1 | 27.73 | TEAD2 | 28.46 | TEAD3 | 29.03 | TEAD4 | 28.35 |
| N3 | 18S | 10.96 | TEAD1 | 28.31 | TEAD2 | 28.66 | TEAD3 | 28.48 | TEAD4 | 28.18 |
| N4 | 18S | 10.17 | TEAD1 | 28.13 | TEAD2 | 29.26 | TEAD3 | 29.02 | TEAD4 | 28.69 |
| N4 | 18S | 9.57 | TEAD1 | 29.04 | TEAD2 | 28.97 | TEAD3 | 29.47 | TEAD4 | 29.13 |
| N4 | 18S | 10.06 | TEAD1 | 29.79 | TEAD2 | 29.57 | TEAD3 | 29.34 | TEAD4 | 28.48 |
| N5 | 18S | 11.21 | TEAD1 | 26.59 | TEAD2 | 26.12 | TEAD3 | 28.63 | TEAD4 | 26.98 |
| N5 | 18S | 11.07 | TEAD1 | 26.36 | TEAD2 | 26.55 | TEAD3 | 27.43 | TEAD4 | 26.77 |
| N5 | 18S | 10.85 | TEAD1 | 27.16 | TEAD2 | 25.16 | TEAD3 | 27.58 | TEAD4 | 27.03 |
| N6 | 18S | 11.15 | TEAD1 | 26.87 | TEAD2 | 27.52 | TEAD3 | 25.66 | TEAD4 | 28.46 |
| N6 | 18S | 10.73 | TEAD1 | 27.90 | TEAD2 | 27.77 | TEAD3 | 25.99 | TEAD4 | 27.58 |
| N6 | 18S | 10.56 | TEAD1 | 28.65 | TEAD2 | 28.04 | TEAD3 | 25.41 | TEAD4 | 26.99 |
| N7 | 18S | 10.55 | TEAD1 | 25.38 | TEAD2 | 24.87 | TEAD3 | 25.09 | TEAD4 | 25.56 |
| N7 | 18S | 10.25 | TEAD1 | 24.98 | TEAD2 | 24.66 | TEAD3 | 25.23 | TEAD4 | 25.15 |
| N7 | 18S | 9.88 | TEAD1 | 24.82 | TEAD2 | 25.43 | TEAD3 | 25.34 | TEAD4 | 24.88 |
| N8 | 18S | 10.33 | TEAD1 | 26.41 | TEAD2 | 26.79 | TEAD3 | 26.85 | TEAD4 | 27.30 |
| N8 | 18S | 9.95 | TEAD1 | 26.26 | TEAD2 | 26.65 | TEAD3 | 27.18 | TEAD4 | 26.94 |
| N8 | 18S | 9.80 | TEAD1 | 27.80 | TEAD2 | 26.95 | TEAD3 | 27.23 | TEAD4 | 27.05 |
| T1 | 18S | 10.15 | TEAD1 | 24.62 | TEAD2 | 23.23 | TEAD3 | 23.47 | TEAD4 | 23.52 |
| T1 | 18S | 10.27 | TEAD1 | 24.13 | TEAD2 | 23.87 | TEAD3 | 24.11 | TEAD4 | 24.26 |
| T1 | 18S | 10.18 | TEAD1 | 24.52 | TEAD2 | 24.01 | TEAD3 | 23.68 | TEAD4 | 24.89 |
| T2 | 18S | 10.53 | TEAD1 | 24.16 | TEAD2 | 24.23 | TEAD3 | 24.36 | TEAD4 | 23.59 |
| T2 | 18S | 10.21 | TEAD1 | 25.38 | TEAD2 | 24.77 | TEAD3 | 25.69 | TEAD4 | 24.36 |
| T2 | 18S | 10.07 | TEAD1 | 24.02 | TEAD2 | 24.56 | TEAD3 | 24.03 | TEAD4 | 24.66 |
| T3 | 18S | 11.13 | TEAD1 | 24.14 | TEAD2 | 24.53 | TEAD3 | 26.74 | TEAD4 | 26.24 |
| T3 | 18S | 11.02 | TEAD1 | 25.06 | TEAD2 | 24.28 | TEAD3 | 25.36 | TEAD4 | 27.96 |
| T3 | 18S | 10.76 | TEAD1 | 26.43 | TEAD2 | 25.05 | TEAD3 | 26.49 | TEAD4 | 26.89 |
| T4 | 18S | 9.87 | TEAD1 | 26.44 | TEAD2 | 25.36 | TEAD3 | 24.68 | TEAD4 | 25.77 |
| T4 | 18S | 10.14 | TEAD1 | 27.12 | TEAD2 | 24.69 | TEAD3 | 23.55 | TEAD4 | 26.43 |
| T4 | 18S | 10.03 | TEAD1 | 27.34 | TEAD2 | 25.95 | TEAD3 | 24.98 | TEAD4 | 26.33 |
| T5 | 18S | 10.01 | TEAD1 | 25.68 | TEAD2 | 26.77 | TEAD3 | 25.25 | TEAD4 | 24.32 |
| T5 | 18S | 9.97 | TEAD1 | 24.55 | TEAD2 | 25.83 | TEAD3 | 25.37 | TEAD4 | 25.69 |
| T5 | 18S | 10.31 | TEAD1 | 25.31 | TEAD2 | 25.91 | TEAD3 | 24.96 | TEAD4 | 24.82 |
| T6 | 18S | 11.33 | TEAD1 | 27.55 | TEAD2 | 28.03 | TEAD3 | 26.75 | TEAD4 | 25.64 |
| T6 | 18S | 11.69 | TEAD1 | 26.21 | TEAD2 | 27.44 | TEAD3 | 27.11 | TEAD4 | 26.32 |
| T6 | 18S | 11.29 | TEAD1 | 26.60 | TEAD2 | 27.80 | TEAD3 | 27.28 | TEAD4 | 25.80 |
| T7 | 18S | 10.25 | TEAD1 | 24.66 | TEAD2 | 23.81 | TEAD3 | 26.35 | TEAD4 | 25.47 |
| T7 | 18S | 10.88 | TEAD1 | 25.09 | TEAD2 | 24.55 | TEAD3 | 25.23 | TEAD4 | 25.65 |
| T7 | 18S | 10.53 | TEAD1 | 24.80 | TEAD2 | 24.66 | TEAD3 | 25.79 | TEAD4 | 26.24 |
| T8 | 18S | 11.22 | TEAD1 | 25.38 | TEAD2 | 24.76 | TEAD3 | 25.44 | TEAD4 | 26.34 |
| T8 | 18S | 10.93 | TEAD1 | 25.86 | TEAD2 | 25.19 | TEAD3 | 25.28 | TEAD4 | 26.18 |
| T8 | 18S | 11.06 | TEAD1 | 26.22 | TEAD2 | 24.43 | TEAD3 | 24.96 | TEAD4 | 24.88 |
| T9 | 18S | 10.42 | TEAD1 | 28.01 | TEAD2 | 26.52 | TEAD3 | 27.12 | TEAD4 | 26.82 |
| T9 | 18S | 10.71 | TEAD1 | 27.85 | TEAD2 | 25.25 | TEAD3 | 27.37 | TEAD4 | 27.21 |
| T9 | 18S | 10.15 | TEAD1 | 27.56 | TEAD2 | 25.39 | TEAD3 | 26.42 | TEAD4 | 27.04 |
| T10 | 18S | 10.73 | TEAD1 | 26.42 | TEAD2 | 25.12 | TEAD3 | 23.46 | TEAD4 | 25.21 |
| T10 | 18S | 10.23 | TEAD1 | 27.37 | TEAD2 | 24.29 | TEAD3 | 24.25 | TEAD4 | 24.84 |
| T10 | 18S | 10.54 | TEAD1 | 27.58 | TEAD2 | 25.47 | TEAD3 | 24.64 | TEAD4 | 24.52 |
| T11 | 18S | 10.00 | TEAD1 | 24.53 | TEAD2 | 23.31 | TEAD3 | 23.57 | TEAD4 | 24.33 |
| T11 | 18S | 10.04 | TEAD1 | 24.60 | TEAD2 | 24.23 | TEAD3 | 23.79 | TEAD4 | 25.03 |
| T11 | 18S | 9.96 | TEAD1 | 24.46 | TEAD2 | 23.58 | TEAD3 | 24.22 | TEAD4 | 24.59 |
| T12 | 18S | 10.17 | TEAD1 | 23.72 | TEAD2 | 22.53 | TEAD3 | 21.42 | TEAD4 | 22.35 |
| T12 | 18S | 10.20 | TEAD1 | 23.66 | TEAD2 | 22.79 | TEAD3 | 22.15 | TEAD4 | 22.52 |
| T12 | 18S | 10.10 | TEAD1 | 24.01 | TEAD2 | 23.03 | TEAD3 | 21.68 | TEAD4 | 22.69 |
| T13 | 18S | 11.32 | TEAD1 | 23.60 | TEAD2 | 21.36 | TEAD3 | 22.16 | TEAD4 | 22.44 |
| T13 | 18S | 11.41 | TEAD1 | 23.46 | TEAD2 | 22.13 | TEAD3 | 22.35 | TEAD4 | 21.80 |
| T13 | 18S | 11.56 | TEAD1 | 23.15 | TEAD2 | 21.58 | TEAD3 | 22.57 | TEAD4 | 22.21 |
| T14 | 18S | 9.99 | TEAD1 | 25.77 | TEAD2 | 23.56 | TEAD3 | 25.41 | TEAD4 | 24.52 |
| T14 | 18S | 10.13 | TEAD1 | 25.37 | TEAD2 | 24.04 | TEAD3 | 24.88 | TEAD4 | 24.39 |
| T14 | 18S | 10.18 | TEAD1 | 25.27 | TEAD2 | 23.80 | TEAD3 | 24.94 | TEAD4 | 24.03 |
| T15 | 18S | 11.24 | TEAD1 | 22.52 | TEAD2 | 21.26 | TEAD3 | 22.34 | TEAD4 | 23.03 |
| T15 | 18S | 10.93 | TEAD1 | 22.31 | TEAD2 | 22.17 | TEAD3 | 22.48 | TEAD4 | 22.78 |
| T15 | 18S | 11.14 | TEAD1 | 22.20 | TEAD2 | 21.65 | TEAD3 | 22.63 | TEAD4 | 22.84 |
| T16 | 18S | 11.73 | TEAD1 | 23.63 | TEAD2 | 21.35 | TEAD3 | 20.80 | TEAD4 | 23.97 |
| T16 | 18S | 11.78 | TEAD1 | 23.35 | TEAD2 | 21.52 | TEAD3 | 21.26 | TEAD4 | 24.63 |
| T16 | 18S | 11.66 | TEAD1 | 22.94 | TEAD2 | 21.67 | TEAD3 | 21.38 | TEAD4 | 24.55 |
| T17 | 18S | 11.60 | TEAD1 | 22.05 | TEAD2 | 23.46 | TEAD3 | 24.66 | TEAD4 | 26.32 |
| T17 | 18S | 11.85 | TEAD1 | 22.02 | TEAD2 | 23.04 | TEAD3 | 23.80 | TEAD4 | 25.47 |
| T17 | 18S | 11.87 | TEAD1 | 21.74 | TEAD2 | 22.83 | TEAD3 | 24.26 | TEAD4 | 25.84 |
| T18 | 18S | 11.86 | TEAD1 | 26.25 | TEAD2 | 27.09 | TEAD3 | 25.33 | TEAD4 | 24.68 |
| T18 | 18S | 11.68 | TEAD1 | 26.04 | TEAD2 | 26.64 | TEAD3 | 26.05 | TEAD4 | 24.99 |
| T18 | 18S | 11.72 | TEAD1 | 26.37 | TEAD2 | 26.83 | TEAD3 | 25.64 | TEAD4 | 25.14 |
| T19 | 18S | 11.89 | TEAD1 | 23.15 | TEAD2 | 22.37 | TEAD3 | 23.59 | TEAD4 | 24.12 |
| T19 | 18S | 11.46 | TEAD1 | 23.37 | TEAD2 | 22.15 | TEAD3 | 24.05 | TEAD4 | 24.53 |
| T19 | 18S | 11.22 | TEAD1 | 23.42 | TEAD2 | 21.53 | TEAD3 | 23.80 | TEAD4 | 24.69 |
| T20 | 18S | 9.35 | TEAD1 | 23.47 | TEAD2 | 22.32 | TEAD3 | 24.01 | TEAD4 | 24.43 |
| T20 | 18S | 9.49 | TEAD1 | 23.50 | TEAD2 | 22.58 | TEAD3 | 23.23 | TEAD4 | 23.77 |
| T20 | 18S | 10.16 | TEAD1 | 23.27 | TEAD2 | 22.65 | TEAD3 | 23.74 | TEAD4 | 23.49 |

N represented “Normal ovary”, T represented “OSC”.

Supplemental Figure 1. The protein levels of TEAD2 in normal ovary cell line IOSE80 and OSC cell lines A2780, TOV112D, SKOV-3 and OVCAR3.

TEAD2:


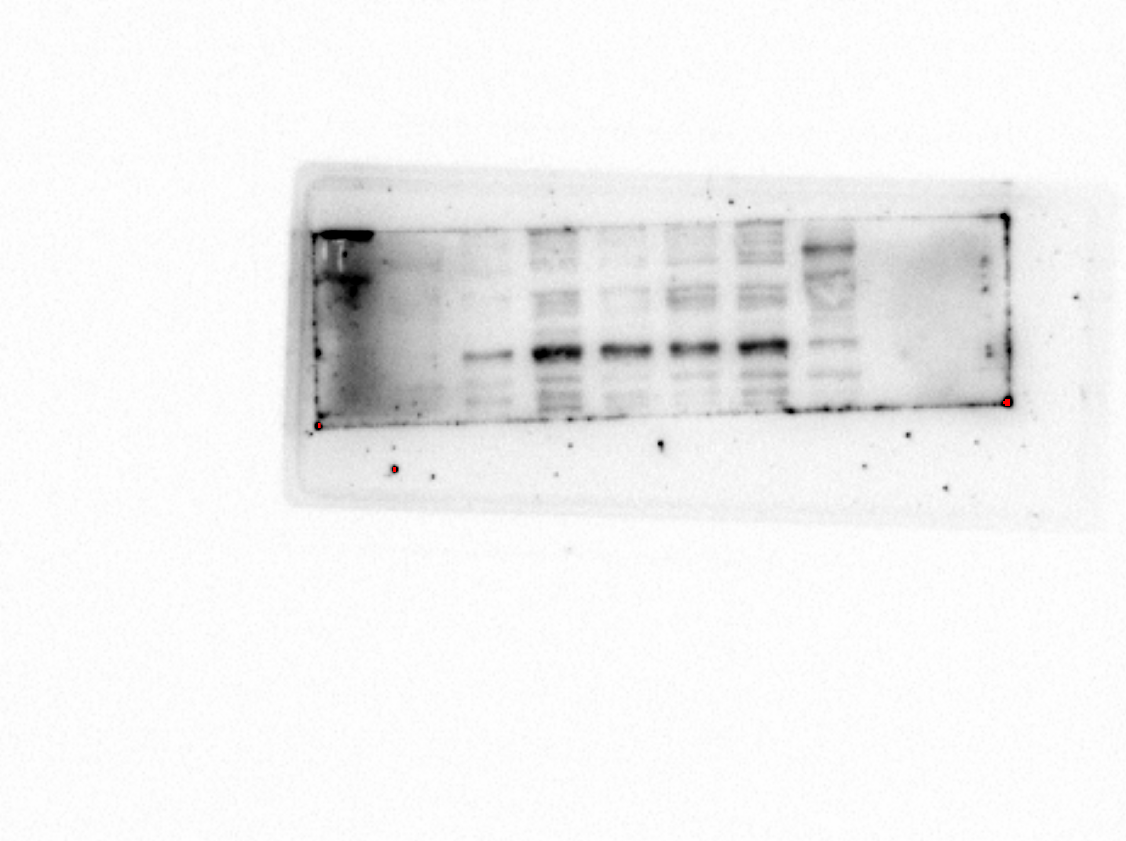


Actin:


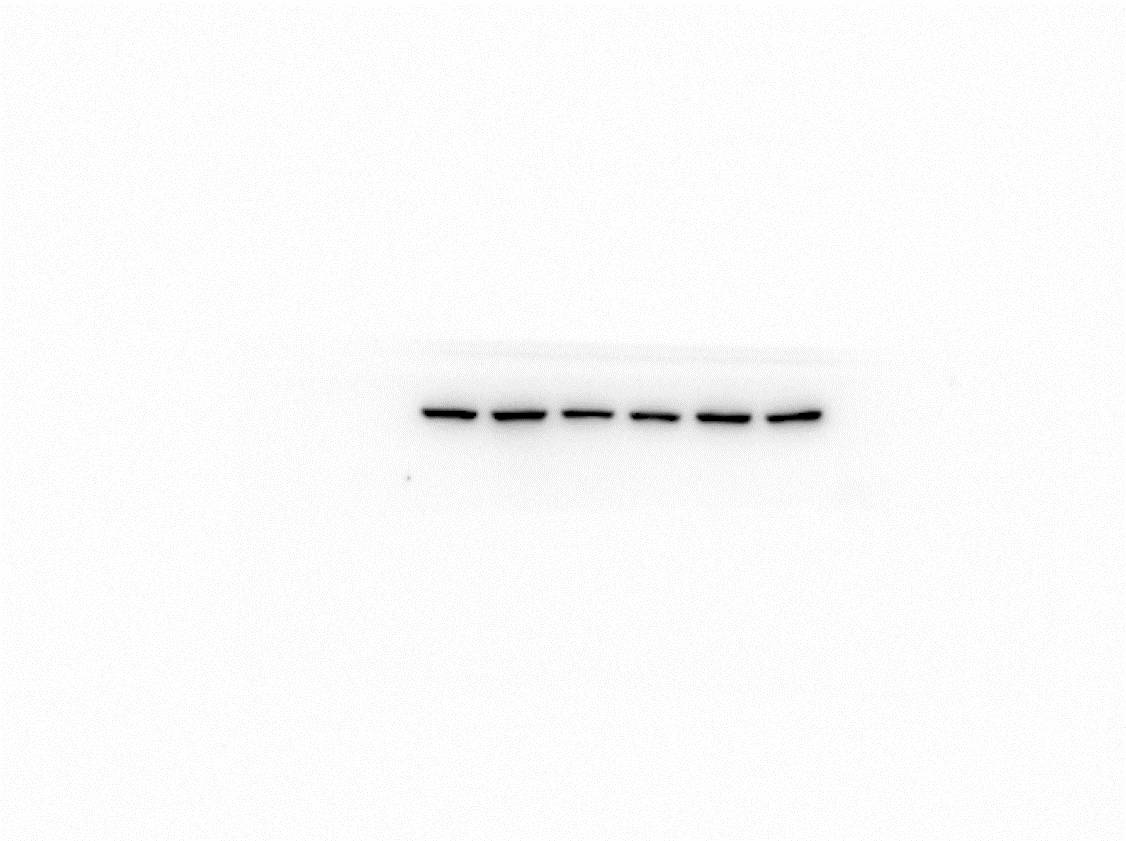


Supplemental Figure 2. Knockout of TEAD2 in A2780 cells was confirmed by Western blot.

siTEAD2:


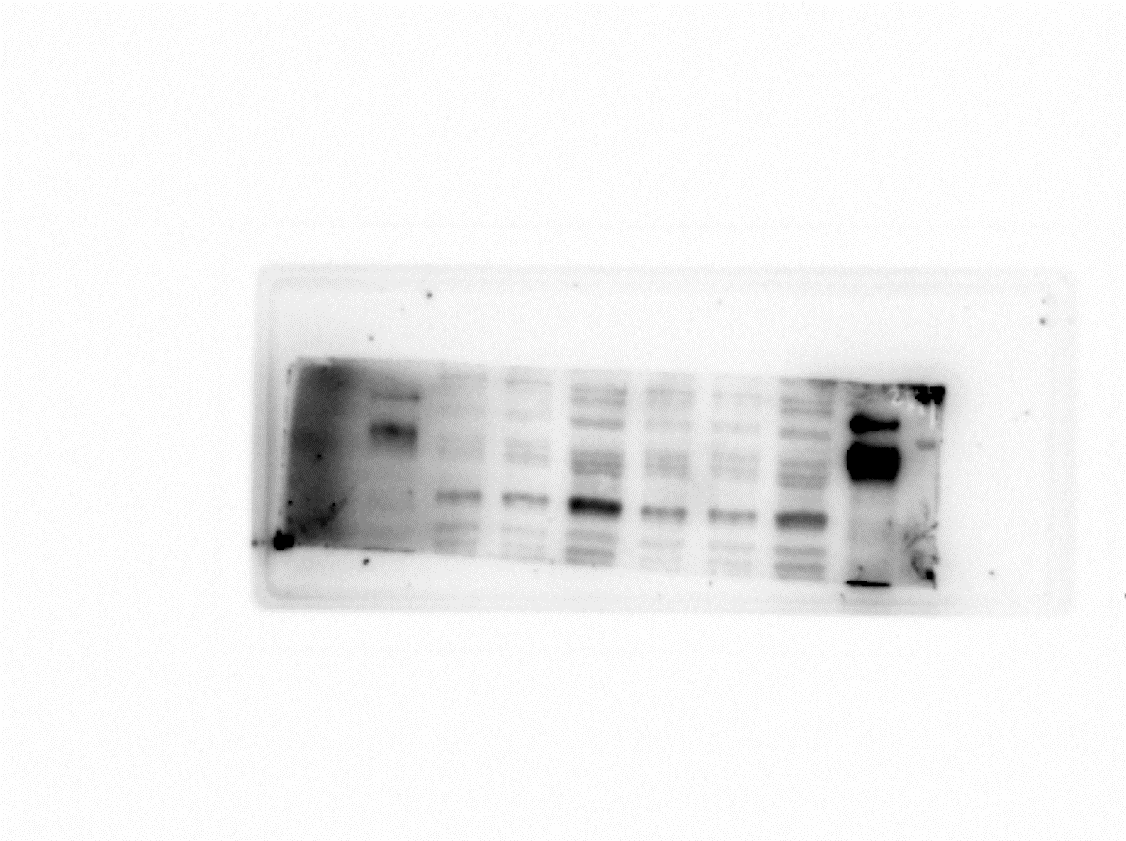


Actin:


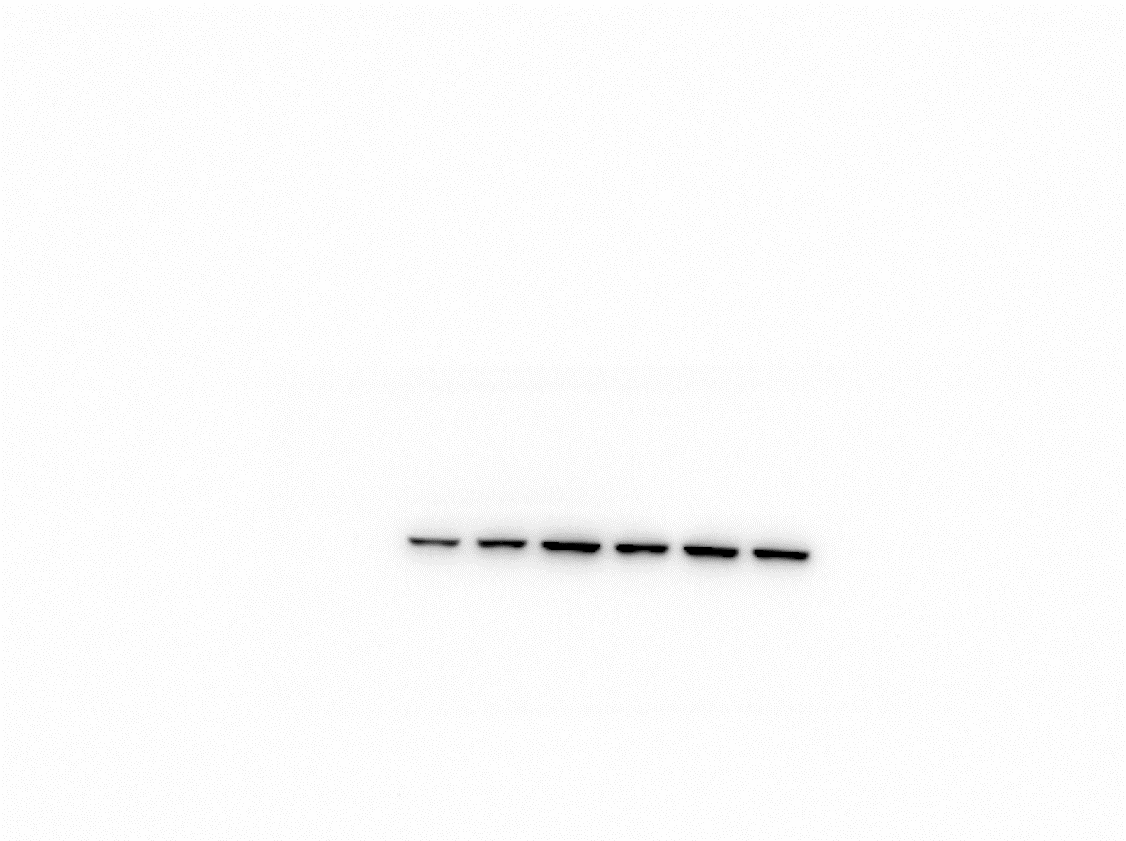

Supplement: Supplementary file 1 [file get_supplementary_file.php]
